# Supplementary figures and images for: The rapidly evolving X-linked MIR-506 family fine-tunes spermatogenesis to enhance sperm competition
Source: eLife journal article supplement (doi:10.7554/elife.90203), 2024-01-09

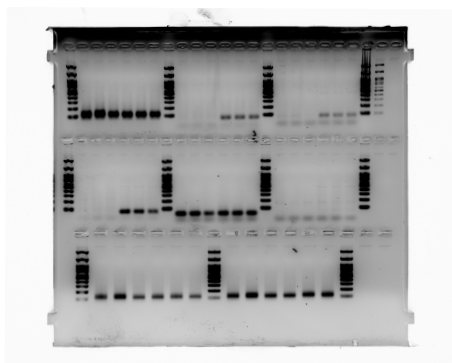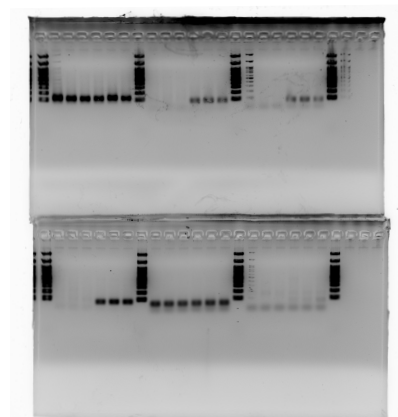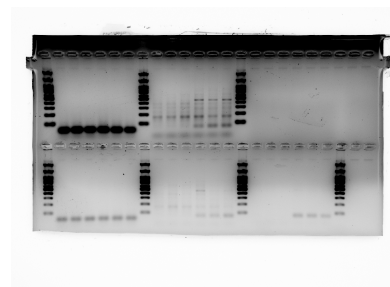

Supplement: fig2-data1 [file elife-90203-fig2-data1-v1.zip]

E

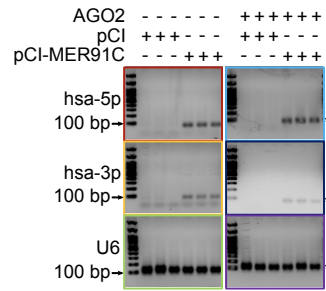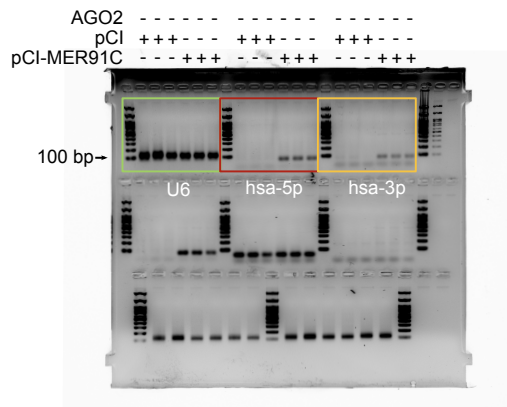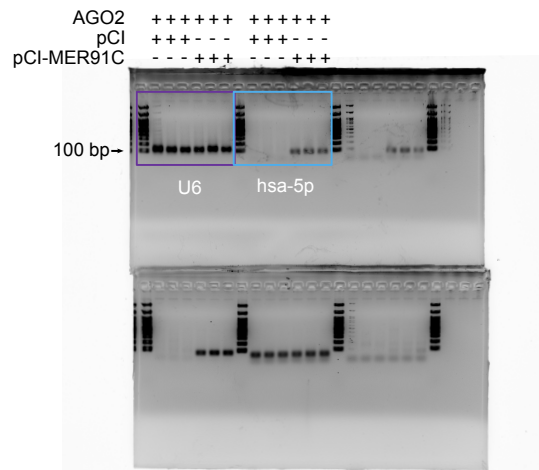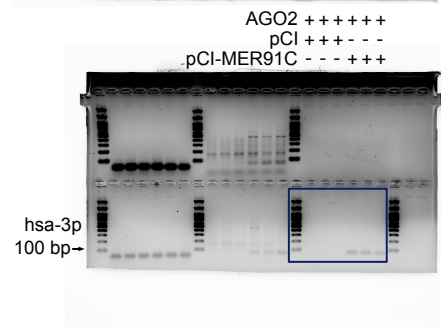

Supplement: fig2-data2 [file elife-90203-fig2-data2-v1.zip]

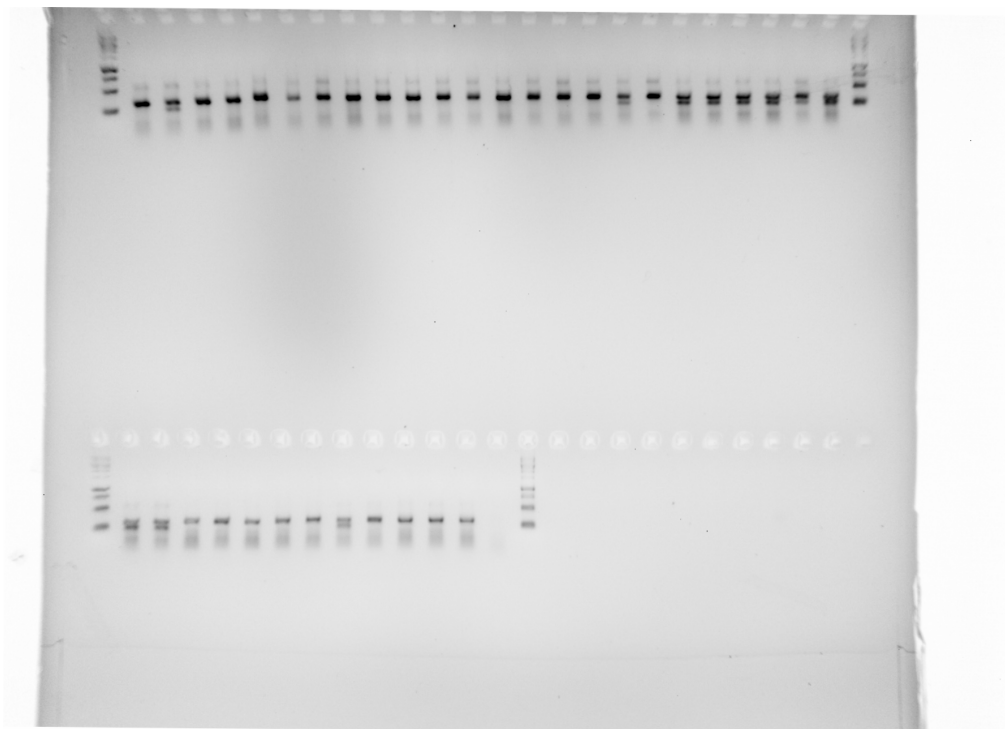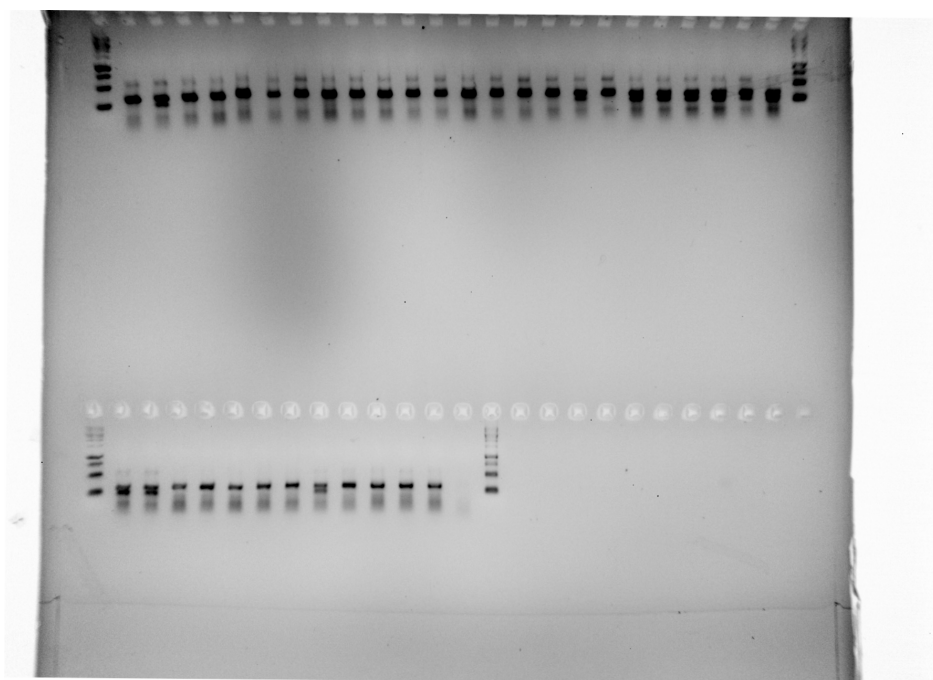

Supplement: fig4-data1 [file elife-90203-fig4-data1-v1.zip]

H

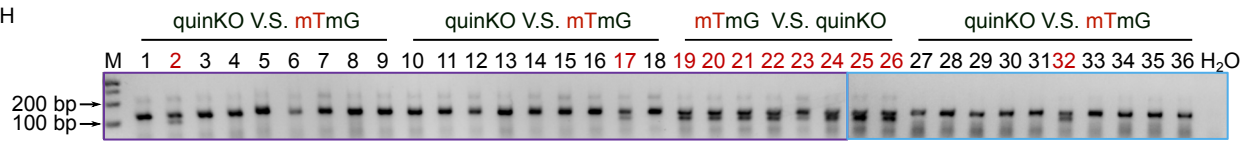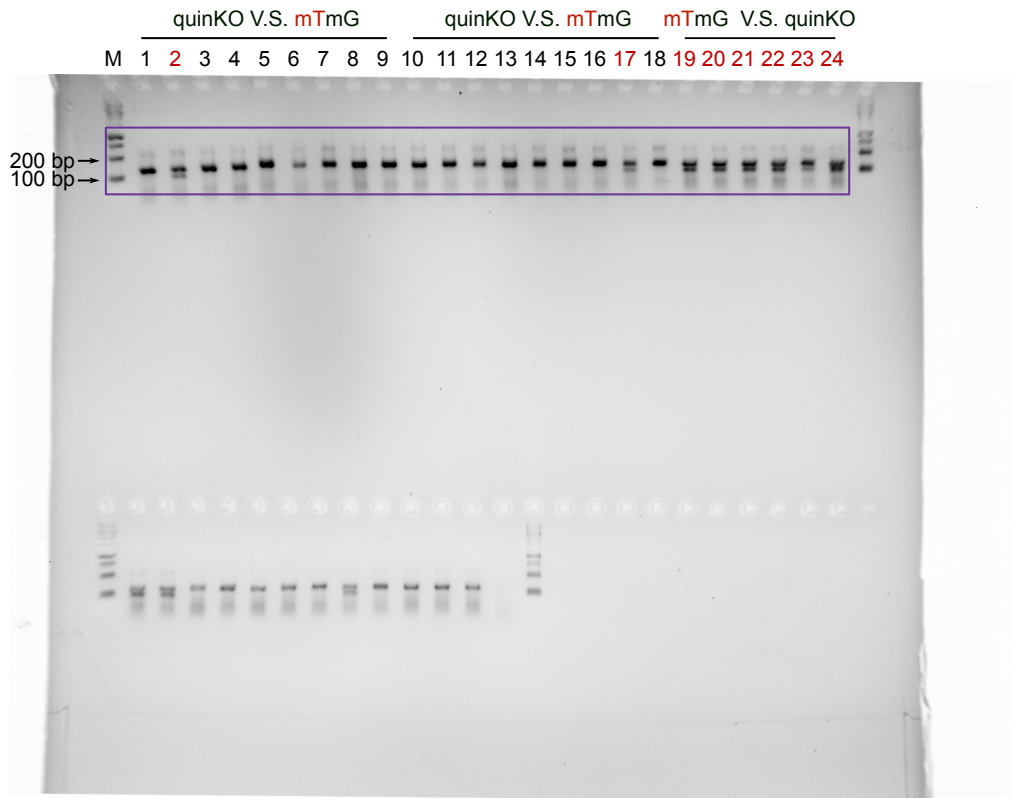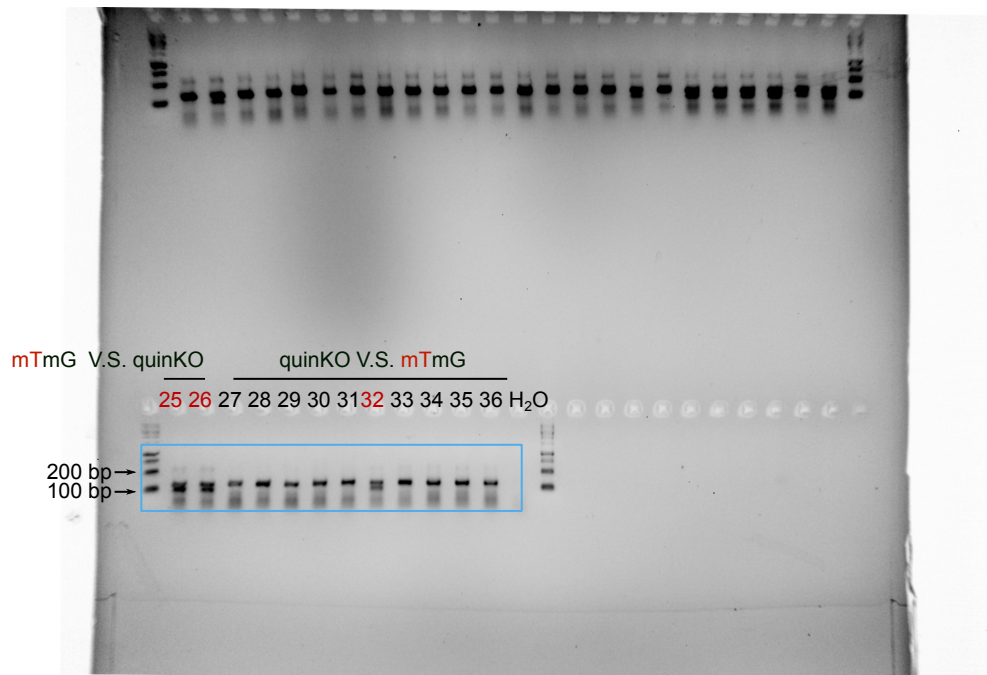

Supplement: fig4-data2 [file elife-90203-fig4-data2-v1.zip]
